# Supplementary material for: New Organophilic Montmorillonites with Lactic Acid Oligomers and Other Environmentally Friendly Compounds and Their Effect on Mechanical Properties of Polylactide (PLA)
Source: MDPI journal article supplement (doi:10.3390/ma14216286), 2021-10-21
Supplement: s1 [file s1]

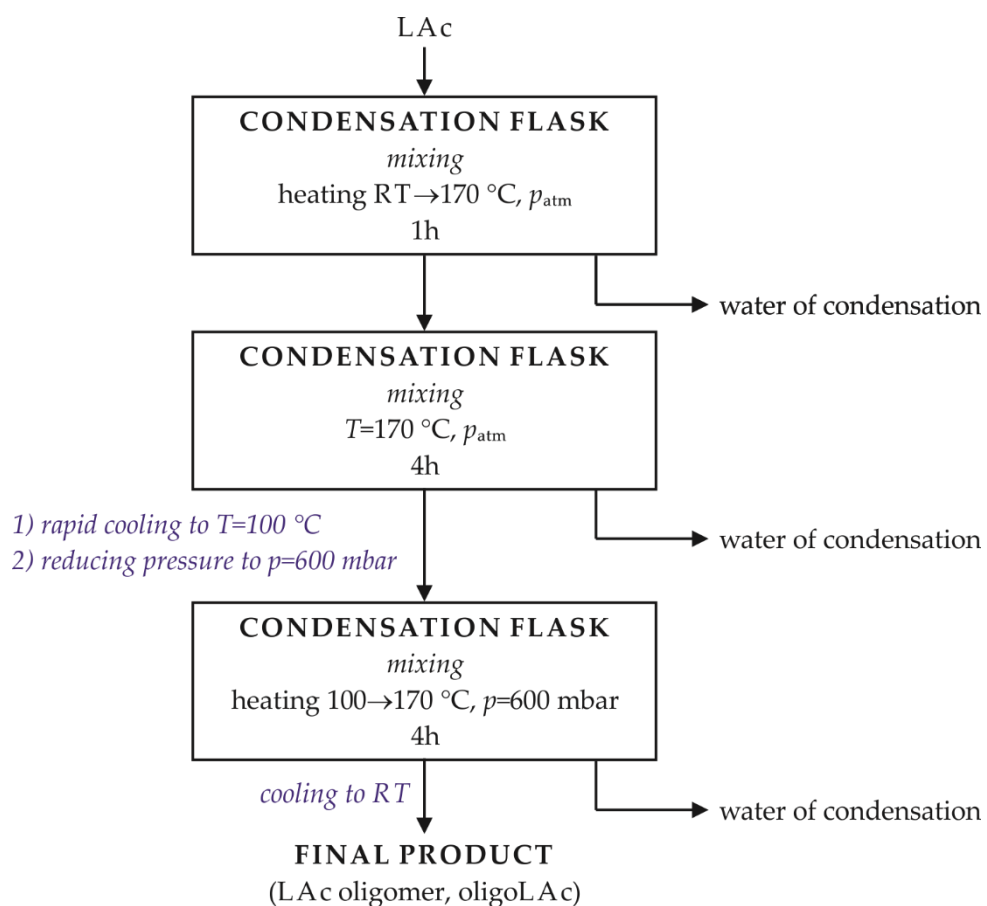

**Figure S1.** Flow chart of the procedure applied during the synthesis of pure LAc oligomer (oligoLAc). Abbreviations: RT—room temperature, Lac—lactic acid,  $p_{\text{atm}}$ —atmospheric pressure

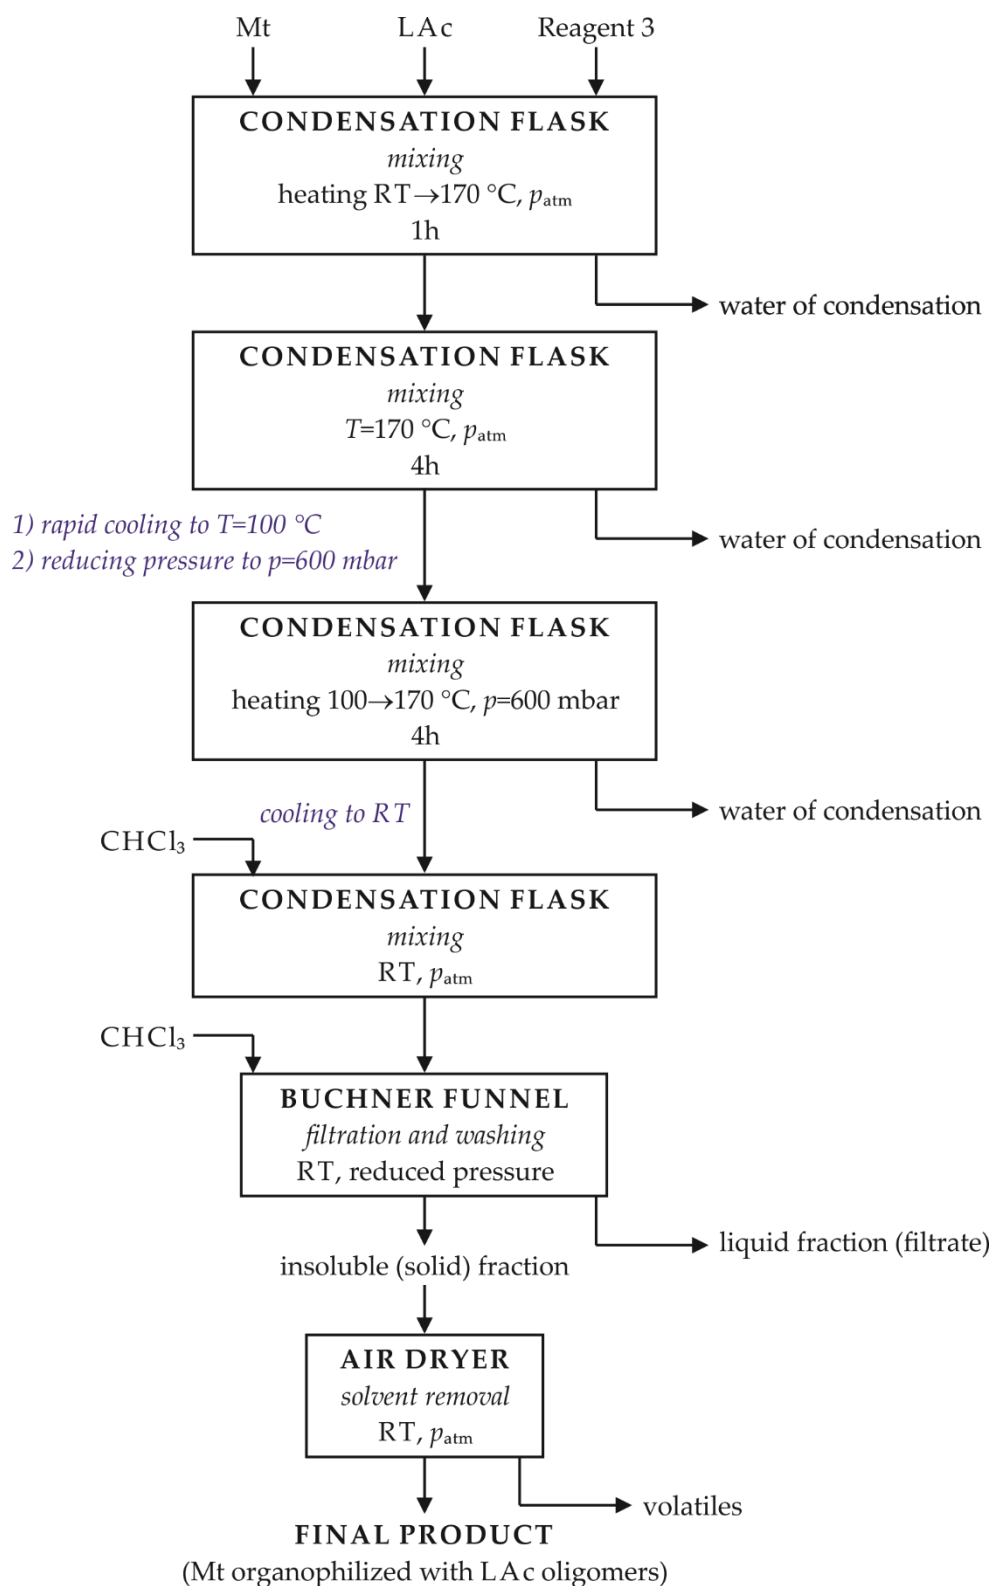

**Figure S2.** Flow chart of the procedure applied during the modification of montmorillonite with: lactic acid oligomers (synthesis of Mt-LAc, no Reagent 3 used), lactic acid oligomers and maleic anhydride (synthesis of Mt-LAc-MA, MA used as Reagent 3) or lactic acid oligomers and pentaerythritol (synthesis of Mt-LAc-PT, PT used as Reagent 3). Abbreviations: Mt- montmorillonite, LAc—lactic acid, MA—maleic anhydride, PT—pentaerythritol, RT—room temperature,  $p_{\text{atm}}$ —atmospheric pressure,

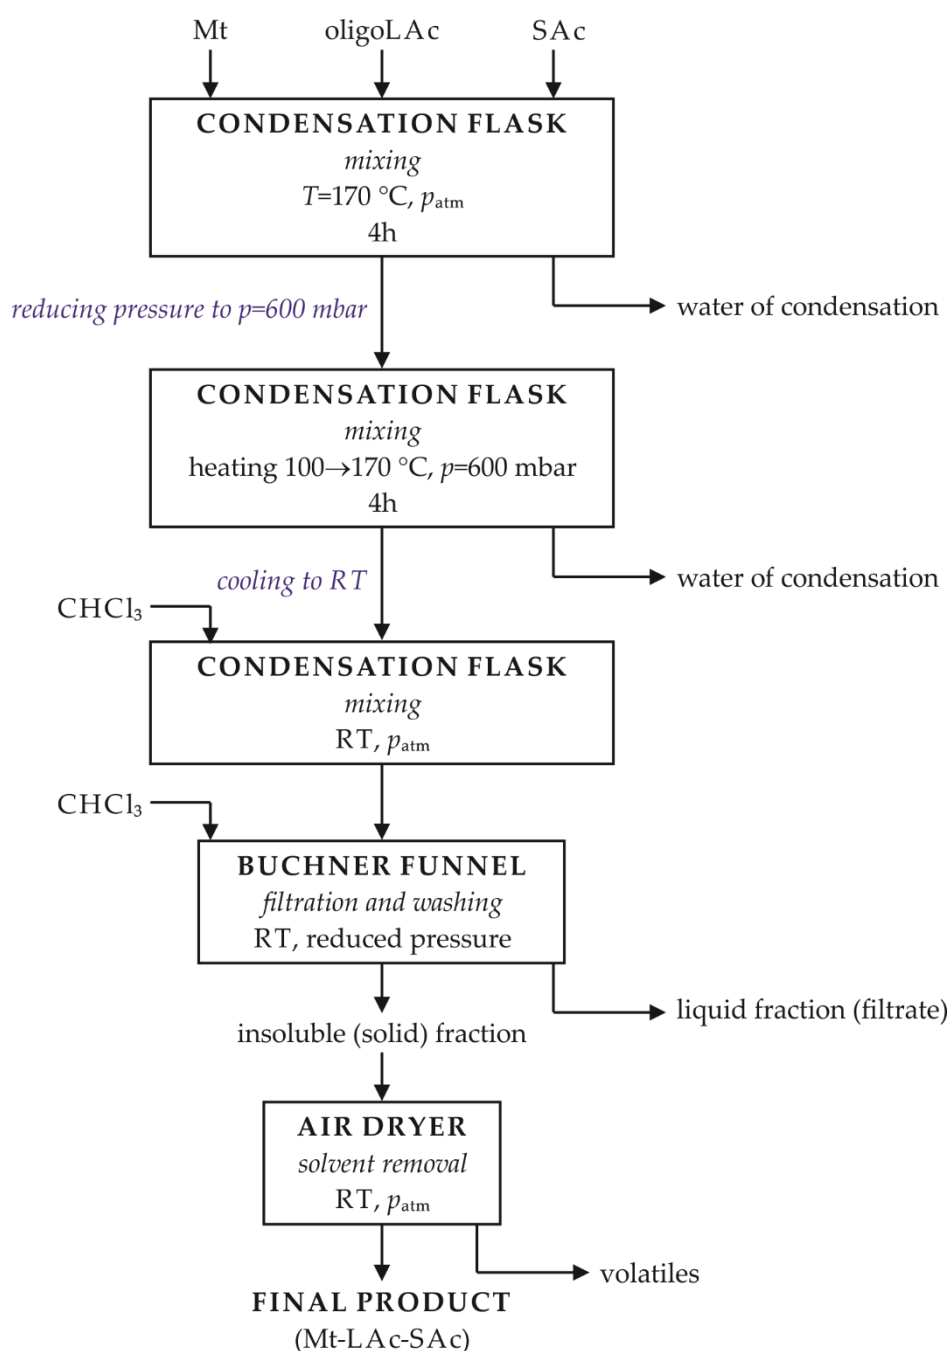

**Figure S3.** Flow chart of the procedure applied during the modification of montmorillonite with lactic acid oligomers and stearic acid (synthesis of Mt-LAc-SAc). Abbreviations: Mt—montmorillonite, oligoLAc—lactic acid oligomer, SAc—stearic acid,  $p_{\text{atm}}$ —atmospheric pressure, RT—room temperature,.

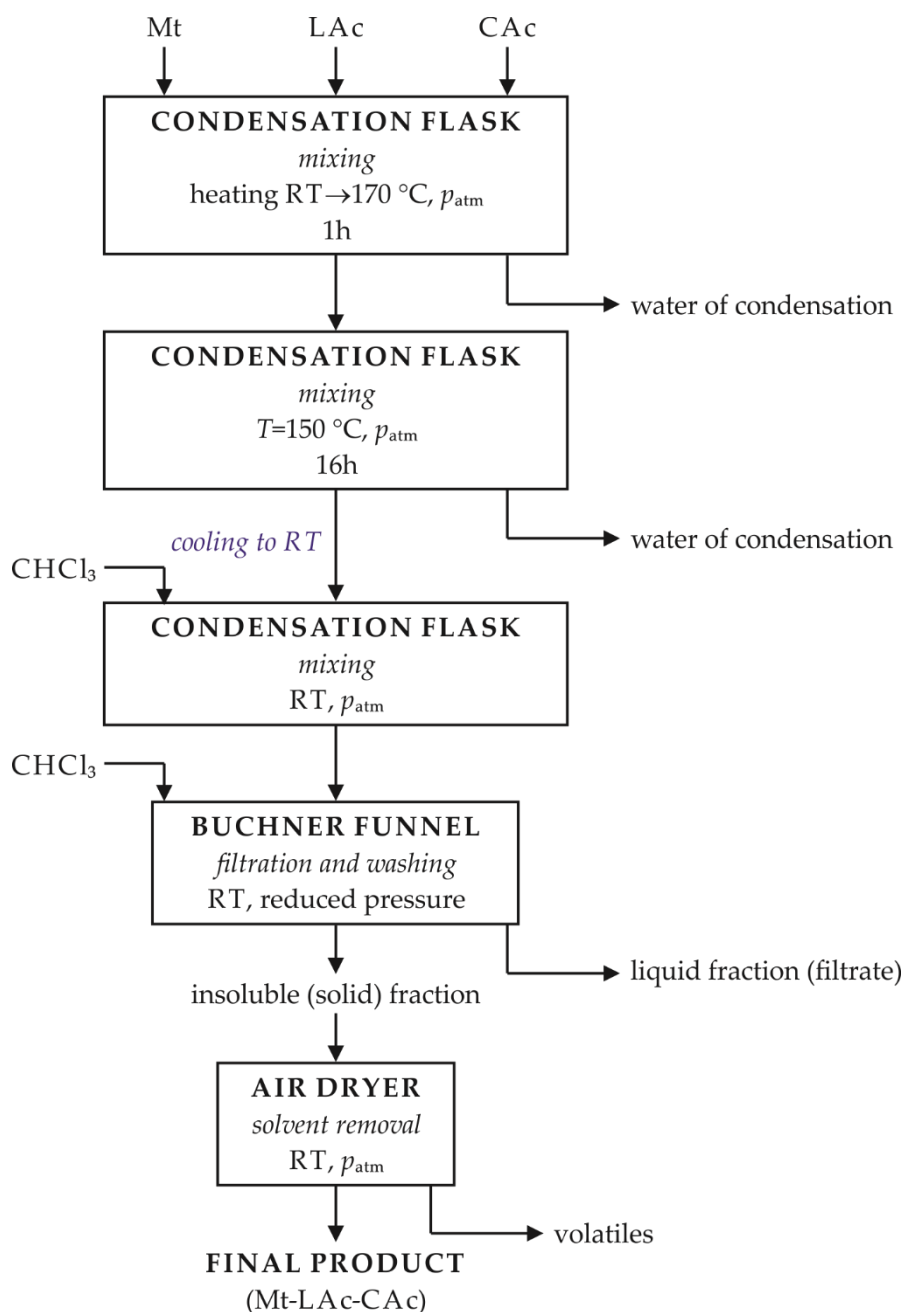

**Figure S4.** Flow chart of the procedure applied during the modification of montmorillonite with lactic acid oligomers and citric acid (synthesis of Mt-LAc-CAc). Abbreviations: Mt—montmorillonite, Lac—lactic acid, CAc—citric acid, RT—room temperature,  $p_{\text{atm}}$ —atmospheric pressure.

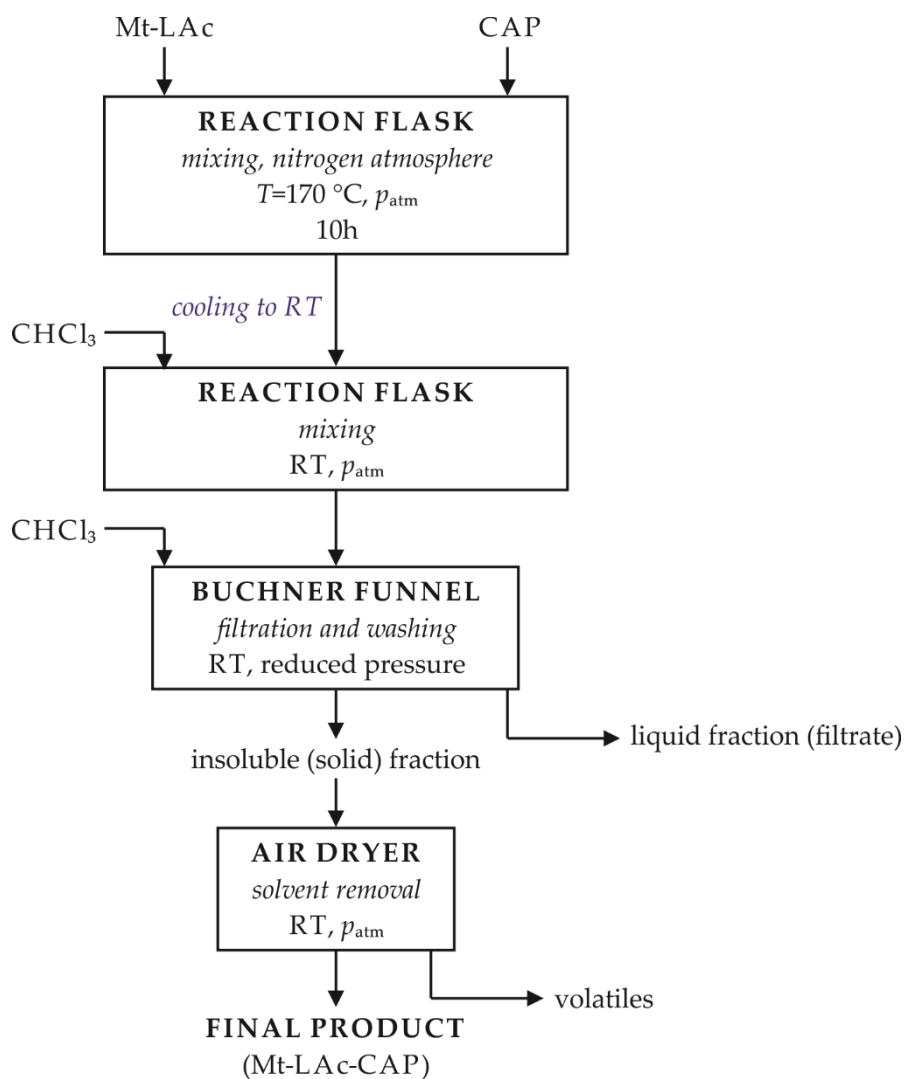

**Figure S5.** Flow chart of the procedure applied during the modification of montmorillonite with lactic acid oligomers and  $\epsilon$ -caprolactone (synthesis of Mt-LAc-CAP). Abbreviations: Mt-montmorillonite, LAc—lactic acid, CAP— $\epsilon$ -caprolactone, RT—room temperature,  $p_{\text{atm}}$ —atmospheric pressure.
